# Supplementary material for: Secretome of Undifferentiated Neural Progenitor Cells Induces Histological and Motor Improvements in a Rat Model of Parkinson's Disease
Source: PubMed Central journal article supplement — Stem Cells Transl Med. 2018 Sep 20;7(11):829–38. doi: 10.1002/sctm.18-0009 (PMC6216452; doi:10.1002/sctm.18-0009), 2018-09-20
Supplement: SCT3-7-829-s003.pdf [file SCT3-7-829-s003.pdf]

## **Supplemental Information**

### **Untargeted Proteomics - Mass Spectrometry Analysis**

#### **In gel digestion/Sample preparation**

hNPCs CM was firstly concentrated (100X) using a 5 kDA cut-off concentrator (Vivaspin, GE Healthcare, Little Chalfont, UK. [http://www3.gehealthcare.com/en/global\\_gateway](http://www3.gehealthcare.com/en/global_gateway)) by ultracentrifugation at 3000 g during 45 min. For this purpose, the samples were precipitated using the Trichloroacetic acid - Acetone procedure (TCA). TCA was added to each sample to a final concentration of 20% (v/v), followed by 30 minutes of incubation at -80°C and centrifugation at 20 000 g for 20 min. Protein pellets were washed with ice-cold (-20°C) acetone. Briefly, the pellets were solubilized in acetone, aided by ultrasonication, followed by a centrifugation at 20 000 g for 20 min. The washed pellets were resuspended in 40 µL 2X Laemmli buffer (BioRad), aided by ultrasonication and denaturation at 95°C, and 10 µL of each replicate were used to create a pooled sample for protein identification.

After denaturation, the replicates and pooled sample were alkylated with acrylamide and subjected in gel digestion by using the short-GeLC approach [1]. Briefly, the entire sample was loaded in a “4–20% TGX Stain-Free Gel” (Bio-Rad) and subjected to a partially electrophoretic separation: 15 min at 110 V to allow the samples to enter into the gel. After SDS-PAGE proteins were visualized with Colloidal Coomassie Blue. The staining was performed as previously described [2] with slight modifications [3]. The entire lanes were sliced into three parts and each part was sliced in small pieces and processed. Gel pieces were destained using the destaining solution (50 mM ammonium bicarbonate and 30% acetonitrile) following by a washing step with water. Gel pieces were dehydrated on Concentrador Plus/Vacufug Plus (Eppendorf, Hamburg, Germany. <https://www.eppendorf.com/OC-en/>). Then, were added 75 µL of trypsin (0.01 µg/µL solution in 10 mM ammonium bicarbonate) to the dried gel bands and left for 15 min on ice to rehydrate de gel pieces. After this period, 30 µL of 10 mM ammonium bicarbonate were added and in-gel digestion was performed overnight in the dark at RT. After the digestion, the excess solution from gel pieces were collected to a low binding microcentrifuge tube (LoBind, Eppendorf) and peptides were extracted from the gel pieces by sequential addition of three solutions of acetonitrile (ACN) in 1%

formic acid (FA) (30%, 50%, and 98% of ACN, respectively). After the addition of each solution, the tubes were shaken in the thermomixer (Eppendorf) at 1050 rpm for 15 min and the solution was collected to the tube containing the previous fraction. At this stage, the peptides extracted from the three fraction of each replicate sample were combined into a single sample for quantitative analysis. All the peptides mixtures were dried (preferentially not completely) by rotary evaporation under vacuum. Before performing the liquid chromatography coupled with tandem mass spectrometry analysis (LC-MS/MS), the peptide mixtures were subjected to SPE using OMIX tips with C18 stationary phase (Agilent Technologies, Santa Clara, CA, USA. <http://www.agilent.com/home>) as recommended by the manufacture. Eluates were dried by rotator evaporation, avoiding to totally evaporate the samples and peptides mixtures were resuspended in 20  $\mu$ L solution of 2% ACN and 0.1% FA followed by vortex, spin and sonication in water bath [2 min with pulses of 1-1 s sonication followed by 1 s break pulse, at 20% intensity, in a sonicator VibraCell 750 watts (Sonics&Materials, Newtown, CT, USA. <http://www.sonics.com/>)]. In order to remove insoluble material the peptide mixture were then centrifuged for 5 min at 14 000 g and collected into the proper vial for LC-MS injection.

### **Sequential Window Acquisition of All Theoretical Mass Spectra (SWATH) Acquisition**

Samples were analyzed on a Triple TOF 5600 System (Sciex) in two phases: information-dependent acquisition (IDA) of the pooled sample and SWATH (Sequential Windowed data independent Acquisition of the Total High-resolution Mass Spectra) acquisition of each individual sample. Peptides were resolved by LC (nanoLC Ultra 2D, Eksigent, Dublin, CA, USA. <http://www.eksigentllc.com/>) on a Micro LC column ChromXP C18CL (300  $\mu$ m ID  $\times$  15cm length, 3  $\mu$ m particles, 120  $\text{\AA}$  pore size; Eksigent) at 5  $\mu$ L/min with a multistep gradient: 0-2 min linear gradient from 5 to 10 %, 2-45 min linear gradient from 10 % to 30 % and, 45-46 min to 35 % of acetonitrile in 0.1 % FA. Peptides were eluted into the mass spectrometer using an electrospray ionization source (DuoSpray Source, Sciex) with a 50  $\mu$ m internal diameter (ID) stainless steel emitter (New Objective, Ringoes, NJ, USA. <http://www.sisweb.com/contact.htm>). IDA experiments were performed for each 3 peptides mixtures of the pooled sample. The mass spectrometer was set to scanning full spectra of ions

(350-1250 m/z range) for 250 ms, followed by up to 100 MS/MS scans (100–1500 m/z from a dynamic accumulation time - minimum 30 ms for precursor above the intensity threshold of 1000, to maintain a cycle time of 3.3 s). Candidate ions with a charge state between +2 and +5 and counts above a minimum threshold of 10 counts per second were isolated for fragmentation and one MS/MS spectra was collected before adding those ions to the exclusion list for 25 seconds (mass spectrometer operated by Analyst TF 1.7, Sciex). Rolling collision was used with a collision energy spread of 5 eV. Peptide identification and library generation were performed with Protein Pilot software (Sciex, v5.1), using the following parameters: i) search against a database composed by *Homo Sapiens* from SwissProt (release at April 2016), and *malE*-GFP; ii) acrylamide alkylated cysteines as fixed modification and iii) trypsin as digestion type. An independent False Discovery Rate (FDR) analysis using the target-decoy approach provided with Protein Pilot software was used to assess the quality of the identifications and positive identifications were considered when identified proteins and peptides reached a 5% local FDR.

For SWATH-MS based experiments, the mass spectrometer was operated in a looped product ion mode [4] and the same chromatographic conditions used as in the IDA run described above. The SWATH-MS setup was designed specifically for the samples to be analyzed, in order to adapt the SWATH windows to the complexity of the set of samples to be analyzed. A set of 60 windows of variable width (containing 1 m/z for the window overlap) was constructed covering the precursor mass range of 350-1250 m/z (Table S1). A 250 ms survey scan (350-1250 m/z) was acquired at the beginning of each cycle for instrument calibration and SWATH-MS spectra were collected from 100–1500 m/z for 50 ms, resulting in a cycle time of 3.25 s from the precursors ranging from 350 to 1250 m/z. The collision energy for each window was determined according to the calculation for a charge +2 ion centered upon the window with variable collision energy spread (CES) according with the window.

A specific library of precursor masses and fragment ions was created by combining all files from the IDA experiments, and used for subsequent SWATH processing. Libraries were obtained using Protein Pilot<sup>TM</sup> software (Sciex, v5.1) with the same parameters as described above. Data processing was performed using SWATH processing plug-in for PeakView (Sciex, v2.0.01). Briefly,

peptides were selected automatically from the library using the following criteria: (i) the unique peptides for a specific targeted protein were ranked by the intensity of the precursor ion from the IDA analysis as estimated by the ProteinPilot software and (ii) Peptides that contained biological modifications and/or were shared between different protein entries/isoforms were excluded from selection. Up to 15 peptides were chosen per protein, and SWATH quantitation was attempted for all proteins in library file that were identified below 5% local FDR from ProteinPilot searches. In SWATH acquisition data peptides are confirmed by finding and scoring peak groups, which are a set of fragment ions for the peptide. Target fragment ions, up to 5, were automatically selected and peak groups were scored following the criteria previously described [5]. The chromatographic profiles of the target fragment ions of those peptides were extracted using an extracted-ion chromatogram (XIC) window of 4 minutes with 100 ppm XIC width, and the peak group confidence threshold was determined based on a FDR analysis using the target-decoy approach. Positive identification was considered for proteins with at least 1 peptide with a FDR below 1%.

**Table S1.** SWATH-MS method

|           | m/z range   | Width (Da) | CES |
|-----------|-------------|------------|-----|
| Window 1  | 349.5-355   | 5.5        | 5   |
| Window 2  | 354-360.9   | 6.9        | 5   |
| Window 3  | 359.9-367.2 | 7.3        | 5   |
| Window 4  | 366.2-372.5 | 6.3        | 5   |
| Window 5  | 371.5-378.8 | 7.3        | 5   |
| Window 6  | 377.8-385.1 | 7.3        | 5   |
| Window 7  | 384.1-391.9 | 7.8        | 5   |
| Window 8  | 390.9-398.6 | 7.7        | 5   |
| Window 9  | 397.6-405.8 | 8.2        | 5   |
| Window 10 | 404.8-413   | 8.2        | 5   |
| Window 11 | 412-420.7   | 8.7        | 5   |

|           |             |     |   |
|-----------|-------------|-----|---|
| Window 12 | 419.7-428.3 | 8.6 | 5 |
| Window 13 | 427.3-435.5 | 8.2 | 5 |
| Window 14 | 434.5-443.2 | 8.7 | 5 |
| Window 15 | 442.2-450.8 | 8.6 | 5 |
| Window 16 | 449.8-458.9 | 9.1 | 5 |
| Window 17 | 457.9-467   | 9.1 | 5 |
| Window 18 | 466-475.1   | 9.1 | 5 |
| Window 19 | 474.1-483.2 | 9.1 | 5 |
| Window 20 | 482.2-491.3 | 9.1 | 5 |
| Window 21 | 490.3-499   | 8.7 | 5 |
| Window 22 | 498-506.6   | 8.6 | 5 |
| Window 23 | 505.6-514.3 | 8.7 | 5 |
| Window 24 | 513.3-521.9 | 8.6 | 5 |
| Window 25 | 520.9-529.1 | 8.2 | 5 |
| Window 26 | 528.1-536.8 | 8.7 | 5 |
| Window 27 | 535.8-544.4 | 8.6 | 5 |
| Window 28 | 543.4-552.1 | 8.7 | 5 |
| Window 29 | 551.1-559.8 | 8.7 | 5 |
| Window 30 | 558.8-567.4 | 8.6 | 5 |
| Window 31 | 566.4-575.1 | 8.7 | 5 |
| Window 32 | 574.1-583.2 | 9.1 | 5 |
| Window 33 | 582.2-591.7 | 9.5 | 5 |
| Window 34 | 590.7-600.3 | 9.6 | 5 |
| Window 35 | 599.3-608.4 | 9.1 | 5 |
| Window 36 | 607.4-616.9 | 9.5 | 5 |
| Window 37 | 615.9-625.9 | 10  | 5 |
| Window 38 | 624.9-634.9 | 10  | 5 |

|           |               |       |    |
|-----------|---------------|-------|----|
| Window 39 | 633.9-644.4   | 10.5  | 5  |
| Window 40 | 643.4-654.3   | 10.9  | 5  |
| Window 41 | 653.3-664.6   | 11.3  | 5  |
| Window 42 | 663.6-675.4   | 11.8  | 5  |
| Window 43 | 674.4-687.1   | 12.7  | 5  |
| Window 44 | 686.1-700.2   | 14.1  | 5  |
| Window 45 | 699.2-713.2   | 14    | 5  |
| Window 46 | 712.2-725.4   | 13.2  | 5  |
| Window 47 | 724.4-737.1   | 12.7  | 5  |
| Window 48 | 736.1-750.1   | 14    | 5  |
| Window 49 | 749.1-763.2   | 14.1  | 5  |
| Window 50 | 762.2-777.1   | 14.9  | 5  |
| Window 51 | 776.1-794.7   | 18.6  | 5  |
| Window 52 | 793.7-812.7   | 19    | 8  |
| Window 53 | 811.7-833.4   | 21.7  | 8  |
| Window 54 | 832.4-856.8   | 24.4  | 8  |
| Window 55 | 855.8-885.6   | 29.8  | 8  |
| Window 56 | 884.6-921.1   | 36.5  | 8  |
| Window 57 | 920.1-967.5   | 47.4  | 8  |
| Window 58 | 966.5-1020.1  | 53.6  | 10 |
| Window 59 | 1019.1-1102.9 | 83.8  | 10 |
| Window 60 | 1101.9-1249.6 | 147.7 | 10 |

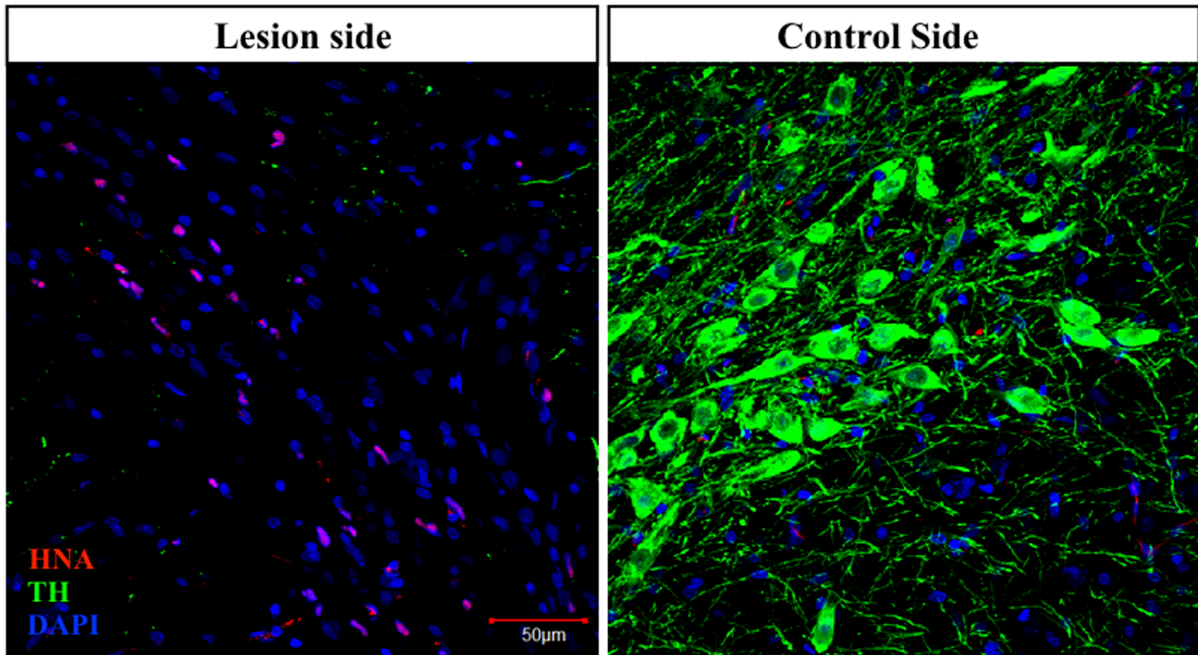

**Figure S1.** Confocal images depicting hNPCs (stained for HNA, in red). hNPCs were only able to survive in the SNpc of one animal, 8 weeks after transplantation. Abbreviations: hNPCs, human neural progenitor cells; HNA, human nuclear antigen; TH, tyrosine hydroxylase. (Scale bar: 50 µm).

**Table S2.** Total list of proteins identified in hNPCs secretome by combined MS approach

| <b>Accession Number</b> | <b>Accession Name</b> | <b>Protein name recommended_UNIPROT</b>   |
|-------------------------|-----------------------|-------------------------------------------|
| P02751                  | FINC_HUMAN            | Fibronectin                               |
| P02768                  | ALBU_HUMAN            | Serum albumin                             |
| P08123                  | CO1A2_HUMAN           | Collagen alpha-2(I) chain                 |
| P21333                  | FLNA_HUMAN            | Filamin-A                                 |
| P01023                  | A2MG_HUMAN            | Alpha-2-macroglobulin                     |
| P08253                  | MMP2_HUMAN            | 72 kDa type IV collagenase                |
| P12109                  | CO6A1_HUMAN           | Collagen alpha-1(VI) chain                |
| P02787                  | TRFE_HUMAN            | Serotransferrin                           |
| Q15063                  | POSTN_HUMAN           | Periostin                                 |
| P08670                  | VIME_HUMAN            | Vimentin                                  |
| P49327                  | FAS_HUMAN             | Fatty acid synthase                       |
| O43707                  | ACTN4_HUMAN           | Alpha-actinin-4 {ECO:0000305}             |
| Q00610                  | CLH1_HUMAN            | Clathrin heavy chain 1                    |
| P12110                  | CO6A2_HUMAN           | Collagen alpha-2(VI) chain                |
| Q16555                  | DPYL2_HUMAN           | Dihydropyrimidinase-related protein 2     |
| P11142                  | HSP7C_HUMAN           | Heat shock cognate 71 kDa protein         |
| P14618                  | KPYM_HUMAN            | Pyruvate kinase PKM                       |
| P29401                  | TKT_HUMAN             | Transketolase                             |
| P30101                  | PDIA3_HUMAN           | Protein disulfide-isomerase A3            |
| P13639                  | EF2_HUMAN             | Elongation factor 2                       |
| P07437                  | TBB5_HUMAN            | Tubulin beta chain                        |
| P05121                  | PAI1_HUMAN            | Plasminogen activator inhibitor 1         |
| P06733                  | ENOA_HUMAN            | Alpha-enolase                             |
| P55072                  | TERA_HUMAN            | Transitional endoplasmic reticulum ATPase |



|        |             |                                                   |
|--------|-------------|---------------------------------------------------|
| P55786 | PSA_HUMAN   | Puromycin-sensitive aminopeptidase                |
| P26038 | MOES_HUMAN  | Moesin                                            |
| P02545 | LMNA_HUMAN  | Prelamin-A/C                                      |
| Q71U36 | TBA1A_HUMAN | Tubulin alpha-1A chain                            |
| P63261 | ACTG_HUMAN  | Actin, cytoplasmic 2                              |
| Q16658 | FSCN1_HUMAN | Fascin                                            |
| O94985 | CSTN1_HUMAN | Calsyntenin-1                                     |
| P31150 | GDIA_HUMAN  | Rab GDP dissociation inhibitor alpha              |
| P07195 | LDHB_HUMAN  | L-lactate dehydrogenase B chain                   |
| P08238 | HS90B_HUMAN | Heat shock protein HSP 90-beta                    |
| P11021 | GRP78_HUMAN | 78 kDa glucose-regulated protein                  |
| P12277 | KCRB_HUMAN  | Creatine kinase B-type                            |
| P22314 | UBA1_HUMAN  | Ubiquitin-like modifier-activating enzyme 1       |
| O75874 | IDHC_HUMAN  | Isocitrate dehydrogenase [NADP] cytoplasmic       |
| P00558 | PGK1_HUMAN  | Phosphoglycerate kinase 1                         |
| P52209 | 6PGD_HUMAN  | 6-phosphogluconate dehydrogenase, decarboxylating |
| P36955 | PEDF_HUMAN  | Pigment epithelium-derived factor                 |
| P09486 | SPRC_HUMAN  | SPARC                                             |
| P60174 | TPIS_HUMAN  | Triosephosphate isomerase                         |
| P06744 | G6PI_HUMAN  | Glucose-6-phosphate isomerase                     |
| P62258 | 1433E_HUMAN | 14-3-3 protein epsilon                            |
| Q16270 | IBP7_HUMAN  | Insulin-like growth factor-binding protein 7      |
| P04406 | G3P_HUMAN   | Glyceraldehyde-3-phosphate dehydrogenase          |
| P00338 | LDHA_HUMAN  | L-lactate dehydrogenase A chain                   |
| Q14194 | DPYL1_HUMAN | Dihydropyrimidinase-related protein 1             |
| P23471 | PTPRZ_HUMAN | Receptor-type tyrosine-protein phosphatase zeta   |
| P04075 | ALDOA_HUMAN | Fructose-bisphosphate aldolase A                  |

|        |             |                                                           |
|--------|-------------|-----------------------------------------------------------|
| Q01995 | TAGL_HUMAN  | Transgelin                                                |
| P27797 | CALR_HUMAN  | Calreticulin                                              |
| P04264 | K2C1_HUMAN  | Keratin, type II cytoskeletal 1                           |
| Q12841 | FSTL1_HUMAN | Follistatin-related protein 1                             |
| P24821 | TENA_HUMAN  | Tenascin                                                  |
| Q9Y617 | SERC_HUMAN  | Phosphoserine aminotransferase                            |
| P21810 | PGS1_HUMAN  | Biglycan                                                  |
| Q14195 | DPYL3_HUMAN | Dihydropyrimidinase-related protein 3                     |
| P23528 | COF1_HUMAN  | Cofilin-1                                                 |
| P37837 | TALDO_HUMAN | Transaldolase                                             |
| P51884 | LUM_HUMAN   | Lumican                                                   |
| Q9BPU6 | DPYL5_HUMAN | Dihydropyrimidinase-related protein 5                     |
| P23284 | PPIB_HUMAN  | Peptidyl-prolyl cis-trans isomerase B                     |
| P62937 | PPIA_HUMAN  | Peptidyl-prolyl cis-trans isomerase A                     |
| P07237 | PDIA1_HUMAN | Protein disulfide-isomerase                               |
| P34932 | HSP74_HUMAN | Heat shock 70 kDa protein 4                               |
| P0DMV9 | HS71B_HUMAN | Heat shock 70 kDa protein 1B {ECO:0000312 HGNC:HGNC:5233} |
| P68104 | EF1A1_HUMAN | Elongation factor 1-alpha 1                               |
| P13645 | K1C10_HUMAN | Keratin, type I cytoskeletal 10                           |
| P40926 | MDHM_HUMAN  | Malate dehydrogenase, mitochondrial                       |
| Q99497 | PARK7_HUMAN | Protein deglycase DJ-1 {ECO:0000303 PubMed:25416785}      |
| Q08380 | LG3BP_HUMAN | Galectin-3-binding protein                                |
| P19022 | CADH2_HUMAN | Cadherin-2                                                |
| P50395 | GDIB_HUMAN  | Rab GDP dissociation inhibitor beta                       |
| Q06830 | PRDX1_HUMAN | Peroxiredoxin-1                                           |
| P09211 | GSTP1_HUMAN | Glutathione S-transferase P                               |
| P61978 | HNRPK_HUMAN | Heterogeneous nuclear ribonucleoprotein K                 |

|        |             |                                                  |
|--------|-------------|--------------------------------------------------|
| O75083 | WDR1_HUMAN  | WD repeat-containing protein 1                   |
| Q14204 | DYHC1_HUMAN | Cytoplasmic dynein 1 heavy chain 1               |
| P22626 | ROA2_HUMAN  | Heterogeneous nuclear ribonucleoproteins A2/B1   |
| P63104 | 1433Z_HUMAN | 14-3-3 protein zeta/delta                        |
| P28074 | PSB5_HUMAN  | Proteasome subunit beta type-5                   |
| Q14697 | GANAB_HUMAN | Neutral alpha-glucosidase AB                     |
| Q96KP4 | CNDP2_HUMAN | Cytosolic non-specific dipeptidase               |
| P27695 | APEX1_HUMAN | DNA-(apurinic or apyrimidinic site) lyase        |
| P00505 | AATM_HUMAN  | Aspartate aminotransferase, mitochondrial        |
| P14625 | ENPL_HUMAN  | Endoplasmin                                      |
| P18669 | PGAM1_HUMAN | Phosphoglycerate mutase 1                        |
| P07355 | ANXA2_HUMAN | Annexin A2                                       |
| P35237 | SPB6_HUMAN  | Serpin B6                                        |
| P35052 | GPC1_HUMAN  | Glypican-1                                       |
| P09936 | UCHL1_HUMAN | Ubiquitin carboxyl-terminal hydrolase isozyme L1 |
| P40925 | MDHC_HUMAN  | Malate dehydrogenase, cytoplasmic                |
| P37802 | TAGL2_HUMAN | Transgelin-2                                     |
| P09104 | ENOG_HUMAN  | Gamma-enolase                                    |
| P16035 | TIMP2_HUMAN | Metalloproteinase inhibitor 2                    |
| P10809 | CH60_HUMAN  | 60 kDa heat shock protein, mitochondrial         |
| P23142 | FBLN1_HUMAN | Fibulin-1                                        |
| P30041 | PRDX6_HUMAN | Peroxiredoxin-6                                  |
| Q16881 | TRXR1_HUMAN | Thioredoxin reductase 1, cytoplasmic             |
| P35908 | K22E_HUMAN  | Keratin, type II cytoskeletal 2 epidermal        |
| O14594 | NCAN_HUMAN  | Neurocan core protein                            |
| P20618 | PSB1_HUMAN  | Proteasome subunit beta type-1                   |
| P12956 | XRCC6_HUMAN | X-ray repair cross-complementing protein 6       |

|        |             |                                            |
|--------|-------------|--------------------------------------------|
| P60900 | PSA6_HUMAN  | Proteasome subunit alpha type-6            |
| Q9NY33 | DPP3_HUMAN  | Dipeptidyl peptidase 3                     |
| P32119 | PRDX2_HUMAN | Peroxiredoxin-2                            |
| P07339 | CATD_HUMAN  | Cathepsin D                                |
| P27348 | 1433T_HUMAN | 14-3-3 protein theta                       |
| Q9HC38 | GLOD4_HUMAN | Glyoxalase domain-containing protein 4     |
| Q16531 | DDB1_HUMAN  | DNA damage-binding protein 1               |
| P22392 | NDKB_HUMAN  | Nucleoside diphosphate kinase B            |
| P07900 | HS90A_HUMAN | Heat shock protein HSP 90-alpha            |
| P17174 | AATC_HUMAN  | Aspartate aminotransferase, cytoplasmic    |
| O15540 | FABP7_HUMAN | Fatty acid-binding protein, brain          |
| Q9BWD1 | THIC_HUMAN  | Acetyl-CoA acetyltransferase, cytosolic    |
| P11766 | ADHX_HUMAN  | Alcohol dehydrogenase class-3              |
| P10909 | CLUS_HUMAN  | Clusterin                                  |
| O14818 | PSA7_HUMAN  | Proteasome subunit alpha type-7            |
| O00410 | IPO5_HUMAN  | Importin-5                                 |
| Q15907 | RB11B_HUMAN | Ras-related protein Rab-11B                |
| P30086 | PEBP1_HUMAN | Phosphatidylethanolamine-binding protein 1 |
| P28066 | PSA5_HUMAN  | Proteasome subunit alpha type-5            |
| Q13838 | DX39B_HUMAN | Spliceosome RNA helicase DDX39B            |
| P01034 | CYTC_HUMAN  | Cystatin-C                                 |
| P12004 | PCNA_HUMAN  | Proliferating cell nuclear antigen         |
| P12814 | ACTN1_HUMAN | Alpha-actinin-1                            |
| P49721 | PSB2_HUMAN  | Proteasome subunit beta type-2             |
| Q14019 | COTL1_HUMAN | Coactosin-like protein                     |
| P49321 | NASP_HUMAN  | Nuclear autoantigenic sperm protein        |
| P01033 | TIMP1_HUMAN | Metalloproteinase inhibitor 1              |

|        |             |                                              |
|--------|-------------|----------------------------------------------|
| Q14974 | IMB1_HUMAN  | Importin subunit beta-1                      |
| P04792 | HSPB1_HUMAN | Heat shock protein beta-1                    |
| P02766 | TTHY_HUMAN  | Transthyretin                                |
| P06576 | ATPB_HUMAN  | ATP synthase subunit beta, mitochondrial     |
| P09651 | ROA1_HUMAN  | Heterogeneous nuclear ribonucleoprotein A1   |
| P18206 | VINC_HUMAN  | Vinculin                                     |
| P07737 | PROF1_HUMAN | Profilin-1                                   |
| Q9BVA1 | TBB2B_HUMAN | Tubulin beta-2B chain                        |
| P14314 | GLU2B_HUMAN | Glucosidase 2 subunit beta                   |
| P09382 | LEG1_HUMAN  | Galectin-1                                   |
| P25787 | PSA2_HUMAN  | Proteasome subunit alpha type-2              |
| Q92820 | GGH_HUMAN   | Gamma-glutamyl hydrolase                     |
| O95336 | 6PGL_HUMAN  | 6-phosphogluconolactonase                    |
| P13010 | XRCC5_HUMAN | X-ray repair cross-complementing protein 5   |
| P60842 | IF4A1_HUMAN | Eukaryotic initiation factor 4A-I            |
| P08758 | ANXA5_HUMAN | Annexin A5                                   |
| P49419 | AL7A1_HUMAN | Alpha-aminoadipic semialdehyde dehydrogenase |
| P35527 | K1C9_HUMAN  | Keratin, type I cytoskeletal 9               |
| P23246 | SFPQ_HUMAN  | Splicing factor, proline- and glutamine-rich |
| P25789 | PSA4_HUMAN  | Proteasome subunit alpha type-4              |
| P23526 | SAHH_HUMAN  | Adenosylhomocysteinase                       |
| P15121 | ALDR_HUMAN  | Aldose reductase                             |
| Q99879 | H2B1M_HUMAN | Histone H2B type 1-M                         |
| P26641 | EF1G_HUMAN  | Elongation factor 1-gamma                    |
| P46821 | MAP1B_HUMAN | Microtubule-associated protein 1B            |
| P14324 | FPPS_HUMAN  | Farnesyl pyrophosphate synthase              |
| Q8NBS9 | TXND5_HUMAN | Thioredoxin domain-containing protein 5      |

|        |             |                                                    |
|--------|-------------|----------------------------------------------------|
| P23396 | RS3_HUMAN   | 40S ribosomal protein S3                           |
| P62987 | RL40_HUMAN  | Ubiquitin-60S ribosomal protein L40                |
| P07858 | CATB_HUMAN  | Cathepsin B                                        |
| Q15019 | SEPT2_HUMAN | Septin-2                                           |
| P25786 | PSA1_HUMAN  | Proteasome subunit alpha type-1                    |
| P62805 | H4_HUMAN    | Histone H4                                         |
| P61981 | 1433G_HUMAN | 14-3-3 protein gamma                               |
| P84077 | ARF1_HUMAN  | ADP-ribosylation factor 1                          |
| Q01581 | HMCS1_HUMAN | Hydroxymethylglutaryl-CoA synthase, cytoplasmic    |
| P30044 | PRDX5_HUMAN | Peroxiredoxin-5, mitochondrial                     |
| Q01469 | FABP5_HUMAN | Fatty acid-binding protein, epidermal              |
| P39019 | RS19_HUMAN  | 40S ribosomal protein S19                          |
| Q14103 | HNRPD_HUMAN | Heterogeneous nuclear ribonucleoprotein D0         |
| Q15631 | TSN_HUMAN   | Translin                                           |
| Q15084 | PDIA6_HUMAN | Protein disulfide-isomerase A6                     |
| P61769 | B2MG_HUMAN  | Beta-2-microglobulin                               |
| Q09028 | RBBP4_HUMAN | Histone-binding protein RBBP4                      |
| Q13509 | TBB3_HUMAN  | Tubulin beta-3 chain                               |
| O00533 | NCHL1_HUMAN | Neural cell adhesion molecule L1-like protein      |
| P68036 | UB2L3_HUMAN | Ubiquitin-conjugating enzyme E2 L3                 |
| P78371 | TCPB_HUMAN  | T-complex protein 1 subunit beta                   |
| O75368 | SH3L1_HUMAN | SH3 domain-binding glutamic acid-rich-like protein |
| Q01518 | CAP1_HUMAN  | Adenylyl cyclase-associated protein 1              |
| P11216 | PYGB_HUMAN  | Glycogen phosphorylase, brain form                 |
| Q13263 | TIF1B_HUMAN | Transcription intermediary factor 1-beta           |
| P49720 | PSB3_HUMAN  | Proteasome subunit beta type-3                     |
| Q04760 | LGUL_HUMAN  | Lactoylglutathione lyase                           |

|        |             |                                             |
|--------|-------------|---------------------------------------------|
| P52565 | GDIR1_HUMAN | Rho GDP-dissociation inhibitor 1            |
| P62269 | RS18_HUMAN  | 40S ribosomal protein S18                   |
| P05388 | RLA0_HUMAN  | 60S acidic ribosomal protein P0             |
| P07686 | HEXB_HUMAN  | Beta-hexosaminidase subunit beta            |
| Q99832 | TCPH_HUMAN  | T-complex protein 1 subunit eta             |
| P10155 | RO60_HUMAN  | 60 kDa SS-A/Ro ribonucleoprotein            |
| O00299 | CLIC1_HUMAN | Chloride intracellular channel protein 1    |
| Q15149 | PLEC_HUMAN  | Plectin                                     |
| P43490 | NAMPT_HUMAN | Nicotinamide phosphoribosyltransferase      |
| P50990 | TCPQ_HUMAN  | T-complex protein 1 subunit theta           |
| O75390 | CISY_HUMAN  | Citrate synthase, mitochondrial             |
| P61604 | CH10_HUMAN  | 10 kDa heat shock protein, mitochondrial    |
| Q12765 | SCRN1_HUMAN | Secernin-1                                  |
| P14866 | HNRPL_HUMAN | Heterogeneous nuclear ribonucleoprotein L   |
| P62081 | RS7_HUMAN   | 40S ribosomal protein S7                    |
| Q15181 | IPYR_HUMAN  | Inorganic pyrophosphatase                   |
| P60981 | DEST_HUMAN  | Dextrin                                     |
| P14550 | AK1A1_HUMAN | Alcohol dehydrogenase [NADP(+)]             |
| Q96QV6 | H2A1A_HUMAN | Histone H2A type 1-A                        |
| P31946 | 1433B_HUMAN | 14-3-3 protein beta/alpha                   |
| P50454 | SERPH_HUMAN | Serpin H1                                   |
| P16949 | STMN1_HUMAN | Stathmin                                    |
| P59998 | ARPC4_HUMAN | Actin-related protein 2/3 complex subunit 4 |
| P28072 | PSB6_HUMAN  | Proteasome subunit beta type-6              |
| P40227 | TCPZ_HUMAN  | T-complex protein 1 subunit zeta            |
| P25788 | PSA3_HUMAN  | Proteasome subunit alpha type-3             |
| P00390 | GSHR_HUMAN  | Glutathione reductase, mitochondrial        |

|        |             |                                                                                   |
|--------|-------------|-----------------------------------------------------------------------------------|
| P06865 | HEXA_HUMAN  | Beta-hexosaminidase subunit alpha                                                 |
| P62826 | RAN_HUMAN   | GTP-binding nuclear protein Ran                                                   |
| P61158 | ARP3_HUMAN  | Actin-related protein 3                                                           |
| P06396 | GELS_HUMAN  | Gelsolin                                                                          |
| P20700 | LMNB1_HUMAN | Lamin-B1                                                                          |
| P61088 | UBE2N_HUMAN | Ubiquitin-conjugating enzyme E2 N                                                 |
| P30153 | 2AAA_HUMAN  | Serine/threonine-protein phosphatase 2A 65 kDa regulatory subunit A alpha isoform |
| Q16851 | UGPA_HUMAN  | UTP--glucose-1-phosphate uridylyltransferase                                      |
| P18065 | IBP2_HUMAN  | Insulin-like growth factor-binding protein 2                                      |
| Q04917 | 1433F_HUMAN | 14-3-3 protein eta                                                                |
| P08865 | RSSA_HUMAN  | 40S ribosomal protein SA {ECO:0000255 HAMAP-Rule:MF_03016}                        |
| P07910 | HNRPC_HUMAN | Heterogeneous nuclear ribonucleoproteins C1/C2                                    |
| Q13907 | IDI1_HUMAN  | Isopentenyl-diphosphate Delta-isomerase 1                                         |
| P28838 | AMPL_HUMAN  | Cytosol aminopeptidase                                                            |
| P53396 | ACLY_HUMAN  | ATP-citrate synthase                                                              |
| Q9NVA2 | SEP11_HUMAN | Septin-11                                                                         |
| Q15691 | MARE1_HUMAN | Microtubule-associated protein RP/EB family member 1                              |
| Q9UKK9 | NUDT5_HUMAN | ADP-sugar pyrophosphatase                                                         |
| P00441 | SODC_HUMAN  | Superoxide dismutase [Cu-Zn]                                                      |
| Q9BRA2 | TXD17_HUMAN | Thioredoxin domain-containing protein 17                                          |
| P46926 | GNPI1_HUMAN | Glucosamine-6-phosphate isomerase 1                                               |
| P13693 | TCTP_HUMAN  | Translationally-controlled tumor protein                                          |
| P05455 | LA_HUMAN    | Lupus La protein                                                                  |
| O15067 | PUR4_HUMAN  | Phosphoribosylformylglycinamide synthase                                          |
| Q14011 | CIRBP_HUMAN | Cold-inducible RNA-binding protein                                                |
| P13797 | PLST_HUMAN  | Plastin-3                                                                         |



|        |             |                                                         |
|--------|-------------|---------------------------------------------------------|
| P63241 | IF5A1_HUMAN | Eukaryotic translation initiation factor 5A-1           |
| Q13404 | UB2V1_HUMAN | Ubiquitin-conjugating enzyme E2 variant 1               |
| P63244 | RACK1_HUMAN | Receptor of activated protein C kinase 1                |
| P09960 | LKHA4_HUMAN | Leukotriene A-4 hydrolase                               |
| P62701 | RS4X_HUMAN  | 40S ribosomal protein S4, X isoform                     |
| P55060 | XPO2_HUMAN  | Exportin-2                                              |
| Q12905 | ILF2_HUMAN  | Interleukin enhancer-binding factor 2                   |
| P30048 | PRDX3_HUMAN | Thioredoxin-dependent peroxide reductase, mitochondrial |
| Q13228 | SBP1_HUMAN  | Selenium-binding protein 1                              |
| P84243 | H33_HUMAN   | Histone H3.3                                            |
| P11586 | C1TC_HUMAN  | C-1-tetrahydrofolate synthase, cytoplasmic              |
| P12955 | PEPD_HUMAN  | Xaa-Pro dipeptidase                                     |
| P35241 | RADI_HUMAN  | Radixin                                                 |
| P04083 | ANXA1_HUMAN | Annexin A1                                              |
| P12081 | SYHC_HUMAN  | Histidine--tRNA ligase, cytoplasmic                     |
| P34897 | GLYM_HUMAN  | Serine hydroxymethyltransferase, mitochondrial          |
| P60953 | CDC42_HUMAN | Cell division control protein 42 homolog                |
| P47756 | CAPZB_HUMAN | F-actin-capping protein subunit beta                    |
| P54687 | BCAT1_HUMAN | Branched-chain-amino-acid aminotransferase, cytosolic   |
| Q15366 | PCBP2_HUMAN | Poly(rC)-binding protein 2                              |
| P00491 | PNPH_HUMAN  | Purine nucleoside phosphorylase                         |
| P99999 | CYC_HUMAN   | Cytochrome c                                            |
| O00154 | BACH_HUMAN  | Cytosolic acyl coenzyme A thioester hydrolase           |
| P38159 | RBMX_HUMAN  | RNA-binding motif protein, X chromosome                 |
| P10599 | THIO_HUMAN  | Thioredoxin                                             |
| P13798 | ACPH_HUMAN  | Acylamino-acid-releasing enzyme                         |
| Q15257 | PTPA_HUMAN  | Serine/threonine-protein phosphatase 2A activator       |

|        |             |                                                                                          |
|--------|-------------|------------------------------------------------------------------------------------------|
| O43852 | CALU_HUMAN  | Calumenin                                                                                |
| P15880 | RS2_HUMAN   | 40S ribosomal protein S2                                                                 |
| P37108 | SRP14_HUMAN | Signal recognition particle 14 kDa protein                                               |
| Q15417 | CNN3_HUMAN  | Calponin-3                                                                               |
| P15531 | NDKA_HUMAN  | Nucleoside diphosphate kinase A                                                          |
| Q969H8 | MYDGF_HUMAN | Myeloid-derived growth factor {ECO:0000303 PubMed:25581518, ECO:0000312 HGNC:HGNC:16948} |
| P78417 | GSTO1_HUMAN | Glutathione S-transferase omega-1                                                        |
| P22234 | PUR6_HUMAN  | Multifunctional protein ADE2                                                             |
| Q99873 | ANM1_HUMAN  | Protein arginine N-methyltransferase 1                                                   |
| P68366 | TBA4A_HUMAN | Tubulin alpha-4A chain                                                                   |
| P33993 | MCM7_HUMAN  | DNA replication licensing factor MCM7                                                    |
| Q16643 | DREB_HUMAN  | Drebrin                                                                                  |
| O94760 | DDAH1_HUMAN | N(G),N(G)-dimethylarginine dimethylaminohydrolase 1                                      |
| P14174 | MIF_HUMAN   | Macrophage migration inhibitory factor                                                   |
| Q8NCW5 | NNRE_HUMAN  | NAD(P)H-hydrate epimerase {ECO:0000255 HAMAP-Rule:MF_03159}                              |
| Q15102 | PA1B3_HUMAN | Platelet-activating factor acetylhydrolase IB subunit gamma                              |
| Q9NTK5 | OLA1_HUMAN  | Obg-like ATPase 1 {ECO:0000255 HAMAP-Rule:MF_03167}                                      |
| P07477 | TRY1_HUMAN  | Trypsin-1                                                                                |
| P42574 | CASP3_HUMAN | Caspase-3                                                                                |
| P51858 | HDGF_HUMAN  | Hepatoma-derived growth factor                                                           |
| P48637 | GSHB_HUMAN  | Glutathione synthetase                                                                   |
| Q53FA7 | QORX_HUMAN  | Quinone oxidoreductase PIG3                                                              |
| P08133 | ANXA6_HUMAN | Annexin A6                                                                               |
| Q9UQ80 | PA2G4_HUMAN | Proliferation-associated protein 2G4                                                     |
| P49368 | TCPG_HUMAN  | T-complex protein 1 subunit gamma                                                        |

|        |              |                                                                         |
|--------|--------------|-------------------------------------------------------------------------|
| P16403 | H12_HUMAN    | Histone H1.2                                                            |
| Q99436 | PSB7_HUMAN   | Proteasome subunit beta type-7                                          |
| Q15365 | PCBP1_HUMAN  | Poly(rC)-binding protein 1                                              |
| P15311 | EZRI_HUMAN   | Ezrin                                                                   |
| P17987 | TCPA_HUMAN   | T-complex protein 1 subunit alpha                                       |
| Q8WX77 | IBPL1_HUMAN  | Insulin-like growth factor-binding protein-like 1                       |
| O95865 | DDAH2_HUMAN  | N(G),N(G)-dimethylarginine dimethylaminohydrolase 2                     |
| P15104 | GLNA_HUMAN   | Glutamine synthetase                                                    |
| P68371 | TBB4B_HUMAN  | Tubulin beta-4B chain                                                   |
| Q9UHD8 | SEPT9_HUMAN  | Septin-9                                                                |
| P29966 | MARCS_HUMAN  | Myristoylated alanine-rich C-kinase substrate                           |
| P46783 | RS10_HUMAN   | 40S ribosomal protein S10                                               |
| P67775 | PP2AA_HUMAN  | Serine/threonine-protein phosphatase 2A catalytic subunit alpha isoform |
| Q9H299 | SH3L3_HUMAN  | SH3 domain-binding glutamic acid-rich-like protein 3                    |
| P62942 | FKBP1A_HUMAN | Peptidyl-prolyl cis-trans isomerase FKBP1A                              |
| P43003 | EAA1_HUMAN   | Excitatory amino acid transporter 1                                     |
| Q96A72 | MGN2_HUMAN   | Protein mago nashi homolog 2                                            |
| P62244 | RS15A_HUMAN  | 40S ribosomal protein S15a                                              |
| Q9BUT1 | BDH2_HUMAN   | 3-hydroxybutyrate dehydrogenase type 2                                  |
| O14531 | DPYL4_HUMAN  | Dihydropyrimidinase-related protein 4                                   |
| P49458 | SRP09_HUMAN  | Signal recognition particle 9 kDa protein                               |
| P68402 | PA1B2_HUMAN  | Platelet-activating factor acetylhydrolase IB subunit beta              |
| P41250 | SYG_HUMAN    | Glycine--tRNA ligase                                                    |
| P62851 | RS25_HUMAN   | 40S ribosomal protein S25                                               |
| P31948 | STIP1_HUMAN  | Stress-induced-phosphoprotein 1                                         |
| P07108 | ACBP_HUMAN   | Acyl-CoA-binding protein                                                |

|        |             |                                                                 |
|--------|-------------|-----------------------------------------------------------------|
| P60660 | MYL6_HUMAN  | Myosin light polypeptide 6                                      |
| O00468 | AGRIN_HUMAN | Agrin                                                           |
| Q9Y266 | NUDC_HUMAN  | Nuclear migration protein nudC                                  |
| P28065 | PSB9_HUMAN  | Proteasome subunit beta type-9                                  |
| Q9Y281 | COF2_HUMAN  | Cofilin-2                                                       |
| P35268 | RL22_HUMAN  | 60S ribosomal protein L22                                       |
| Q92688 | AN32B_HUMAN | Acidic leucine-rich nuclear phosphoprotein 32 family member B   |
| P48643 | TCPE_HUMAN  | T-complex protein 1 subunit epsilon                             |
| P62906 | RL10A_HUMAN | 60S ribosomal protein L10a                                      |
| P11940 | PABP1_HUMAN | Polyadenylate-binding protein 1                                 |
| O43776 | SYNC_HUMAN  | Asparagine--tRNA ligase, cytoplasmic                            |
| P18085 | ARF4_HUMAN  | ADP-ribosylation factor 4                                       |
| P78330 | SERB_HUMAN  | Phosphoserine phosphatase                                       |
| Q06323 | PSME1_HUMAN | Proteasome activator complex subunit 1                          |
| P54578 | UBP14_HUMAN | Ubiquitin carboxyl-terminal hydrolase 14                        |
| P31153 | METK2_HUMAN | S-adenosylmethionine synthase isoform type-2                    |
| P23919 | KTHY_HUMAN  | Thymidylate kinase                                              |
| O15511 | ARPC5_HUMAN | Actin-related protein 2/3 complex subunit 5                     |
| Q14847 | LASP1_HUMAN | LIM and SH3 domain protein 1                                    |
| P33316 | DUT_HUMAN   | Deoxyuridine 5'-triphosphate nucleotidohydrolase, mitochondrial |
| P61457 | PHS_HUMAN   | Pterin-4-alpha-carbinolamine dehydratase                        |
| O00231 | PSD11_HUMAN | 26S proteasome non-ATPase regulatory subunit 11                 |
| Q16181 | SEPT7_HUMAN | Septin-7                                                        |
| Q9NPH2 | INO1_HUMAN  | Inositol-3-phosphate synthase 1                                 |
| Q9UHY7 | ENOPH_HUMAN | Enolase-phosphatase E1 {ECO:0000255 HAMAP-Rule:MF_03117}        |
| Q16778 | H2B2E_HUMAN | Histone H2B type 2-E                                            |
| Q9HAV0 | GBB4_HUMAN  | Guanine nucleotide-binding protein subunit beta-4               |

|        |             |                                                                  |
|--------|-------------|------------------------------------------------------------------|
| P63279 | UBC9_HUMAN  | SUMO-conjugating enzyme UBC9                                     |
| O14979 | HNRDL_HUMAN | Heterogeneous nuclear ribonucleoprotein D-like                   |
| P61247 | RS3A_HUMAN  | 40S ribosomal protein S3a {ECO:0000255 HAMAP-Rule:MF_03122}      |
| Q96FW1 | OTUB1_HUMAN | Ubiquitin thioesterase OTUB1                                     |
| P27824 | CALX_HUMAN  | Calnexin                                                         |
| Q86VP6 | CAND1_HUMAN | Cullin-associated NEDD8-dissociated protein 1                    |
| P35637 | FUS_HUMAN   | RNA-binding protein FUS                                          |
| O43175 | SERA_HUMAN  | D-3-phosphoglycerate dehydrogenase                               |
| Q9Y547 | IFT25_HUMAN | Intraflagellar transport protein 25 homolog                      |
| Q9H0R4 | HDHD2_HUMAN | Haloacid dehalogenase-like hydrolase domain-containing protein 2 |
| P28482 | MK01_HUMAN  | Mitogen-activated protein kinase 1                               |
| P16070 | CD44_HUMAN  | CD44 antigen                                                     |
| P27816 | MAP4_HUMAN  | Microtubule-associated protein 4                                 |
| Q13885 | TBB2A_HUMAN | Tubulin beta-2A chain                                            |
| P62140 | PP1B_HUMAN  | Serine/threonine-protein phosphatase PP1-beta catalytic subunit  |
| Q9NZL9 | MAT2B_HUMAN | Methionine adenosyltransferase 2 subunit beta                    |
| Q9UL46 | PSME2_HUMAN | Proteasome activator complex subunit 2                           |
| Q9GZT8 | NIF3L_HUMAN | NIF3-like protein 1 {ECO:0000305 PubMed:11124544}                |
| Q6EEV6 | SUMO4_HUMAN | Small ubiquitin-related modifier 4                               |
| Q15293 | RCN1_HUMAN  | Reticulocalbin-1                                                 |
| P62917 | RL8_HUMAN   | 60S ribosomal protein L8                                         |
| P52888 | THOP1_HUMAN | Thimet oligopeptidase                                            |
| P62318 | SMD3_HUMAN  | Small nuclear ribonucleoprotein Sm D3                            |
| P01308 | INS_HUMAN   | Insulin                                                          |
| P18621 | RL17_HUMAN  | 60S ribosomal protein L17                                        |
| P68032 | ACTC_HUMAN  | Actin, alpha cardiac muscle 1                                    |
| Q99523 | SORT_HUMAN  | Sortilin                                                         |

|        |             |                                                                                                  |
|--------|-------------|--------------------------------------------------------------------------------------------------|
| Q15819 | UB2V2_HUMAN | Ubiquitin-conjugating enzyme E2 variant 2                                                        |
| O43809 | CPSF5_HUMAN | Cleavage and polyadenylation specificity factor subunit 5                                        |
| Q96G03 | PGM2_HUMAN  | Phosphoglucomutase-2                                                                             |
| O76003 | GLRX3_HUMAN | Glutaredoxin-3                                                                                   |
| Q7KZF4 | SND1_HUMAN  | Staphylococcal nuclease domain-containing protein 1                                              |
| P28070 | PSB4_HUMAN  | Proteasome subunit beta type-4                                                                   |
| P61163 | ACTZ_HUMAN  | Alpha-centractin                                                                                 |
| P31949 | S10AB_HUMAN | Protein S100-A11                                                                                 |
| P19367 | HXK1_HUMAN  | Hexokinase-1                                                                                     |
| P26599 | PTBP1_HUMAN | Polypyrimidine tract-binding protein 1                                                           |
| P51149 | RAB7A_HUMAN | Ras-related protein Rab-7a                                                                       |
| P62820 | RAB1A_HUMAN | Ras-related protein Rab-1A                                                                       |
| Q96AE4 | FUBP1_HUMAN | Far upstream element-binding protein 1                                                           |
| P35080 | PROF2_HUMAN | Profilin-2                                                                                       |
| O14980 | XPO1_HUMAN  | Exportin-1                                                                                       |
| O75223 | GGCT_HUMAN  | Gamma-glutamylcyclotransferase                                                                   |
| Q07812 | BAX_HUMAN   | Apoptosis regulator BAX                                                                          |
| Q92734 | TFG_HUMAN   | Protein TFG                                                                                      |
| P07954 | FUMH_HUMAN  | Fumarate hydratase, mitochondrial                                                                |
| Q9ULV4 | COR1C_HUMAN | Coronin-1C                                                                                       |
| P61586 | RHOA_HUMAN  | Transforming protein RhoA                                                                        |
| Q15121 | PEA15_HUMAN | Astrocytic phosphoprotein PEA-15                                                                 |
| P55263 | ADK_HUMAN   | Adenosine kinase                                                                                 |
| P48681 | NEST_HUMAN  | Nestin                                                                                           |
| P43034 | LIS1_HUMAN  | Platelet-activating factor acetylhydrolase IB subunit alpha<br>{ECO:0000255 HAMAP-Rule:MF_03141} |
| Q9UNM6 | PSD13_HUMAN | 26S proteasome non-ATPase regulatory subunit 13                                                  |

|        |             |                                                          |
|--------|-------------|----------------------------------------------------------|
| Q00688 | FKBP3_HUMAN | Peptidyl-prolyl cis-trans isomerase FKBP3                |
| Q15717 | ELAV1_HUMAN | ELAV-like protein 1                                      |
| P06748 | NPM_HUMAN   | Nucleophosmin                                            |
| Q9UMY4 | SNX12_HUMAN | Sorting nexin-12                                         |
| P12111 | CO6A3_HUMAN | Collagen alpha-3(VI) chain                               |
| P02452 | CO1A1_HUMAN | Collagen alpha-1(I) chain                                |
| Q15582 | BGH3_HUMAN  | Transforming growth factor-beta-induced protein ig-h3    |
| Q14767 | LTBP2_HUMAN | Latent-transforming growth factor beta-binding protein 2 |
| P20908 | CO5A1_HUMAN | Collagen alpha-1(V) chain                                |
| P08476 | INHBA_HUMAN | Inhibin beta A chain                                     |
| P05997 | CO5A2_HUMAN | Collagen alpha-2(V) chain                                |
| O00391 | QSOX1_HUMAN | Sulfhydryl oxidase 1                                     |
| P08572 | CO4A2_HUMAN | Collagen alpha-2(IV) chain                               |
| P26022 | PTX3_HUMAN  | Pentraxin-related protein PTX3                           |
| P05067 | A4_HUMAN    | Amyloid beta A4 protein                                  |
| P35579 | MYH9_HUMAN  | Myosin-9                                                 |
| P13667 | PDIA4_HUMAN | Protein disulfide-isomerase A4                           |
| O76061 | STC2_HUMAN  | Stanniocalcin-2                                          |
| P09493 | TPM1_HUMAN  | Tropomyosin alpha-1 chain                                |
| P19338 | NUCL_HUMAN  | Nucleolin                                                |
| P02765 | FETUA_HUMAN | Alpha-2-HS-glycoprotein                                  |
| P00367 | DHE3_HUMAN  | Glutamate dehydrogenase 1, mitochondrial                 |
| P67936 | TPM4_HUMAN  | Tropomyosin alpha-4 chain                                |
| P13489 | RINI_HUMAN  | Ribonuclease inhibitor                                   |
| O15144 | ARPC2_HUMAN | Actin-related protein 2/3 complex subunit 2              |
| P53618 | COPB_HUMAN  | Coatomer subunit beta                                    |
| Q07954 | LRP1_HUMAN  | Prolow-density lipoprotein receptor-related protein 1    |

|        |             |                                                                |
|--------|-------------|----------------------------------------------------------------|
| Q96GW7 | PGCB_HUMAN  | Brevican core protein                                          |
| P04179 | SODM_HUMAN  | Superoxide dismutase [Mn], mitochondrial                       |
| P62249 | RS16_HUMAN  | 40S ribosomal protein S16                                      |
| Q01105 | SET_HUMAN   | Protein SET                                                    |
| P36222 | CH3L1_HUMAN | Chitinase-3-like protein 1                                     |
| Q13813 | SPTN1_HUMAN | Spectrin alpha chain, non-erythrocytic 1                       |
| Q07020 | RL18_HUMAN  | 60S ribosomal protein L18                                      |
| Q15233 | NONO_HUMAN  | Non-POU domain-containing octamer-binding protein              |
| P10768 | ESTD_HUMAN  | S-formylglutathione hydrolase                                  |
| O60506 | HNRPQ_HUMAN | Heterogeneous nuclear ribonucleoprotein Q                      |
| P30050 | RL12_HUMAN  | 60S ribosomal protein L12                                      |
| Q9Y696 | CLIC4_HUMAN | Chloride intracellular channel protein 4                       |
| P31943 | HNRH1_HUMAN | Heterogeneous nuclear ribonucleoprotein H                      |
| P28161 | GSTM2_HUMAN | Glutathione S-transferase Mu 2                                 |
| P00568 | KAD1_HUMAN  | Adenylate kinase isoenzyme 1 {ECO:0000255 HAMAP-Rule:MF_03171} |
| P46108 | CRK_HUMAN   | Adapter molecule crk                                           |
| P62241 | RS8_HUMAN   | 40S ribosomal protein S8                                       |
| P43121 | MUC18_HUMAN | Cell surface glycoprotein MUC18                                |
| P26639 | SYTC_HUMAN  | Threonine--tRNA ligase, cytoplasmic                            |
| P50991 | TCPD_HUMAN  | T-complex protein 1 subunit delta                              |
| Q13151 | ROA0_HUMAN  | Heterogeneous nuclear ribonucleoprotein A0                     |
| P62857 | RS28_HUMAN  | 40S ribosomal protein S28                                      |
| P43487 | RANG_HUMAN  | Ran-specific GTPase-activating protein                         |
| O75531 | BAF_HUMAN   | Barrier-to-autointegration factor                              |
| O60888 | CUTA_HUMAN  | Protein CutA                                                   |
| P61353 | RL27_HUMAN  | 60S ribosomal protein L27                                      |



|        |             |                                                                              |
|--------|-------------|------------------------------------------------------------------------------|
| P01008 | ANT3_HUMAN  | Antithrombin-III                                                             |
| P26373 | RL13_HUMAN  | 60S ribosomal protein L13                                                    |
| O60462 | NRP2_HUMAN  | Neuropilin-2                                                                 |
| Q6NVV1 | R13P3_HUMAN | Putative 60S ribosomal protein L13a protein RPL13AP3                         |
| O75367 | H2AY_HUMAN  | Core histone macro-H2A.1                                                     |
| P53004 | BIEA_HUMAN  | Biliverdin reductase A                                                       |
| P49589 | SYCC_HUMAN  | Cysteine--tRNA ligase, cytoplasmic                                           |
| Q07666 | KHDR1_HUMAN | KH domain-containing, RNA-binding, signal transduction-associated protein 1  |
| Q14764 | MVP_HUMAN   | Major vault protein                                                          |
| P62854 | RS26_HUMAN  | 40S ribosomal protein S26                                                    |
| P62277 | RS13_HUMAN  | 40S ribosomal protein S13                                                    |
| P62304 | RUXE_HUMAN  | Small nuclear ribonucleoprotein E                                            |
| P16401 | H15_HUMAN   | Histone H1.5                                                                 |
| P42126 | EC11_HUMAN  | Enoyl-CoA delta isomerase 1, mitochondrial                                   |
| P18124 | RL7_HUMAN   | 60S ribosomal protein L7                                                     |
| Q00839 | HNRPU_HUMAN | Heterogeneous nuclear ribonucleoprotein U                                    |
| Q99426 | TBCB_HUMAN  | Tubulin-folding cofactor B                                                   |
| P52597 | HNRPF_HUMAN | Heterogeneous nuclear ribonucleoprotein F                                    |
| P42785 | PCP_HUMAN   | Lysosomal Pro-X carboxypeptidase                                             |
| Q14315 | FLNC_HUMAN  | Filamin-C                                                                    |
| P53602 | MVD1_HUMAN  | Diphosphomevalonate decarboxylase                                            |
| Q99729 | ROAA_HUMAN  | Heterogeneous nuclear ribonucleoprotein A/B                                  |
| P56537 | IF6_HUMAN   | Eukaryotic translation initiation factor 6 {ECO:0000255 HAMAP-Rule:MF_03132} |
| O00469 | PLOD2_HUMAN | Procollagen-lysine,2-oxoglutarate 5-dioxygenase 2                            |
| Q15436 | SC23A_HUMAN | Protein transport protein Sec23A                                             |

|        |             |                                                 |
|--------|-------------|-------------------------------------------------|
| P98179 | RBM3_HUMAN  | RNA-binding protein 3                           |
| Q14566 | MCM6_HUMAN  | DNA replication licensing factor MCM6           |
| P32969 | RL9_HUMAN   | 60S ribosomal protein L9                        |
| P01344 | IGF2_HUMAN  | Insulin-like growth factor II                   |
| P29218 | IMPA1_HUMAN | Inositol monophosphatase 1                      |
| O00487 | PSDE_HUMAN  | 26S proteasome non-ATPase regulatory subunit 14 |
| P06493 | CDK1_HUMAN  | Cyclin-dependent kinase 1                       |
| P62753 | RS6_HUMAN   | 40S ribosomal protein S6                        |
| P05386 | RLA1_HUMAN  | 60S acidic ribosomal protein P1                 |
| P09341 | GROA_HUMAN  | Growth-regulated alpha protein                  |
| P62829 | RL23_HUMAN  | 60S ribosomal protein L23                       |
| P62314 | SMD1_HUMAN  | Small nuclear ribonucleoprotein Sm D1           |
| Q6YP21 | KAT3_HUMAN  | Kynurenine--oxoglutarate transaminase 3         |
| P42766 | RL35_HUMAN  | 60S ribosomal protein L35                       |
| P09874 | PARP1_HUMAN | Poly [ADP-ribose] polymerase 1                  |
| Q9NR31 | SAR1A_HUMAN | GTP-binding protein SAR1a                       |
| Q9Y5S9 | RBM8A_HUMAN | RNA-binding protein 8A                          |
| P16152 | CBR1_HUMAN  | Carbonyl reductase [NADPH] 1                    |
| P07996 | TSP1_HUMAN  | Thrombospondin-1                                |
| P10915 | HPLN1_HUMAN | Hyaluronan and proteoglycan link protein 1      |
| O75326 | SEM7A_HUMAN | Semaphorin-7A                                   |
| P13611 | CSPG2_HUMAN | Versican core protein                           |
| P07585 | PGS2_HUMAN  | Decorin                                         |
| P08603 | CFAH_HUMAN  | Complement factor H                             |
| Q16610 | ECM1_HUMAN  | Extracellular matrix protein 1                  |
| P02461 | CO3A1_HUMAN | Collagen alpha-1(III) chain                     |

|        |             |                                                                      |
|--------|-------------|----------------------------------------------------------------------|
| P98160 | PGBM_HUMAN  | Basement membrane-specific heparan sulfate proteoglycan core protein |
| Q13822 | ENPP2_HUMAN | Ectonucleotide pyrophosphatase/phosphodiesterase family member 2     |
| Q02809 | PLOD1_HUMAN | Procollagen-lysine,2-oxoglutarate 5-dioxygenase 1                    |
| Q13308 | PTK7_HUMAN  | Inactive tyrosine-protein kinase 7                                   |
| P09871 | C1S_HUMAN   | Complement C1s subcomponent                                          |
| Q9NRN5 | OLFL3_HUMAN | Olfactomedin-like protein 3                                          |
| O95965 | ITGBL_HUMAN | Integrin beta-like protein 1                                         |
| Q08629 | TICN1_HUMAN | Testican-1                                                           |
| Q96CG8 | CTHR1_HUMAN | Collagen triple helix repeat-containing protein 1                    |
| P02792 | FRIL_HUMAN  | Ferritin light chain                                                 |
| P11047 | LAMC1_HUMAN | Laminin subunit gamma-1                                              |
| Q9Y490 | TLN1_HUMAN  | Talin-1                                                              |
| P41222 | PTGDS_HUMAN | Prostaglandin-H2 D-isomerase                                         |
| P07093 | GDN_HUMAN   | Glia-derived nexin                                                   |
| P22692 | IBP4_HUMAN  | Insulin-like growth factor-binding protein 4                         |
| Q05682 | CALD1_HUMAN | Caldesmon                                                            |
| P68871 | HBB_HUMAN   | Hemoglobin subunit beta                                              |
| Q13162 | PRDX4_HUMAN | Peroxiredoxin-4                                                      |
| P28300 | LYOX_HUMAN  | Protein-lysine 6-oxidase                                             |
| P35555 | FBN1_HUMAN  | Fibrillin-1                                                          |
| O14786 | NRP1_HUMAN  | Neuropilin-1                                                         |
| P03956 | MMP1_HUMAN  | Interstitial collagenase                                             |
| P00736 | C1R_HUMAN   | Complement C1r subcomponent                                          |
| Q9HCU0 | CD248_HUMAN | Endosialin                                                           |
| Q8IUX7 | AEBP1_HUMAN | Adipocyte enhancer-binding protein 1                                 |
| Q9UBX5 | FBLN5_HUMAN | Fibulin-5                                                            |

|        |             |                                                          |
|--------|-------------|----------------------------------------------------------|
| P55287 | CAD11_HUMAN | Cadherin-11                                              |
| P19823 | ITIH2_HUMAN | Inter-alpha-trypsin inhibitor heavy chain H2             |
| P19105 | ML12A_HUMAN | Myosin regulatory light chain 12A                        |
| Q9UBG0 | MRC2_HUMAN  | C-type mannose receptor 2                                |
| P02462 | CO4A1_HUMAN | Collagen alpha-1(IV) chain                               |
| Q29963 | 1C06_HUMAN  | HLA class I histocompatibility antigen, Cw-6 alpha chain |
| P42765 | THIM_HUMAN  | 3-ketoacyl-CoA thiolase, mitochondrial                   |
| P06703 | S10A6_HUMAN | Protein S100-A6                                          |
| O75882 | ATRN_HUMAN  | Attractin                                                |
| Q9UBP4 | DKK3_HUMAN  | Dickkopf-related protein 3                               |
| P67809 | YBOX1_HUMAN | Nuclease-sensitive element-binding protein 1             |

## References

1. Anjo SI, Santa C, Manadas B. Short GeLC-SWATH: a fast and reliable quantitative approach for proteomic screenings. *Proteomics* 2015;15:757-762.
2. Candiano G, Bruschi M, Musante L et al. Blue silver: a very sensitive colloidal Coomassie G-250 staining for proteome analysis. *Electrophoresis* 2004;25:1327-1333.
3. Manadas B, Santos AR, Szabadfi K et al. BDNF-induced changes in the expression of the translation machinery in hippocampal neurons: protein levels and dendritic mRNA. *J Proteome Res* 2009; 8:4536-4552.
4. Gillet LC, Navarro P, Tate S et al. Targeted data extraction of the MS/MS spectra generated by data-independent acquisition: a new concept for consistent and accurate proteome analysis. *Mol Cell Proteomics* 2012; 11:O111.016717.
5. Lambert JP, Ivosev G, Couzens AL et al. Mapping differential interactomes by affinity purification coupled with data-independent mass spectrometry acquisition. *Nat Methods* 2013; 10:1239.1245.
